# Supplementary material
Source: Springer Nature journal article supplement (https://www.springermedizin.de/resource/supplementary/12884_2012_662_MOESM4_ESM.pdf/9458456)
Supplement: MOESM4 [file 9458456]

**Table 3. Explained variance ( $R^2$  % by Nagelkerke) of having the first baby at an *advanced* and *very advanced* paternal age; 35-39 years vs  $\geq 40$  years, compared with men aged 25-34 years in four blocks of exposure variables<sup>a</sup>.**

| Block <sup>b</sup>                             | Explained variance of each block |               | Cumulative explained variance |               |
|------------------------------------------------|----------------------------------|---------------|-------------------------------|---------------|
|                                                | 35-39 yrs                        | $\geq 40$ yrs | 35-39 yrs                     | $\geq 40$ yrs |
|                                                | $R^2$                            | $R^2$         | $R^2$                         | $R^2$         |
| Sociodemographics                              | 6.6                              | 7.8           | 6.6                           | 7.8           |
| Health behaviour, physical and mental problems | 4.0                              | 6.8           | 10.5                          | 14.3          |
| Planning of pregnancy                          | 2.7                              | 2.7           | 12.5                          | 16.5          |
| Social relationships                           | 0.5                              | 1.7           | 12.8                          | 17.4          |

<sup>a</sup>Blocks entered either as first block (Explained variance of each block) or in sequential order (Cumulative explained variance).

<sup>b</sup>Variables in each block as in Table 2.
